# Supplementary material
Source: ML conference proceedings conference paper supplement (https://openaccess.thecvf.com/content/WACV2022/html/Li_Pose-Guided_Generative_Adversarial_WACV_2022_paper.html)
Supplement: Supplementary file 1 [file Li_Pose-Guided_Generative_Adversarial_WACV_2022_supplemental.pdf]

# Pose-guided Action Separable Generative Adversarial Net for Novel View Video Synthesis (Supplementary Material)

In this document, we first provide the details of each component of the proposed network. In Table 1, we show the details of the pose transformation module. In Table 2, we show how we extract multi-scale features from image prior. Similarly, our discriminator and perceptual loss are based on the same structure. One thing worth noting is that we modify the last two layers of vgg16 to output a 2-dimensional fully connected layer and a sigmoid layer as our discriminator. In Table 3, we show how we estimate the pose from the image prior using a prediction head. In Table 5, we show that how to transform the feature from coarse to fine-grained level. Finally, using the video decoder as shown in Table 4, we generate the output action video. In Figure 1, we compare our methods with others. Second, we show more qualitative results of generated frames in Figure 3 - 4. In addition, we also visualize the generated pose of our recurrent pose transformation module. As shown in Figure 2, our module not only learns the motion from original pose sequence, but also transfers the motion into the target view of the input pose. Moreover, we also include a demo video for novel view action prediction.

| Name       | Layer  | Input                 | Neurons | Output Dims<br>(C × M) |
|------------|--------|-----------------------|---------|------------------------|
| pose_full1 | Linear | $p_{s1}$              | 100     | $2 \times 25$          |
| pose_full2 | Linear | $p_{s2}$              | 100     | $2 \times 25$          |
| pose_full3 | Linear | pose_full1+pose_full2 | 100     | $2 \times 25$          |
| vp_full1   | Linear | $\theta_1$            | 25      | $1 \times 25$          |
| vp_full2   | Linear | $\theta_2$            | 25      | $1 \times 25$          |
| vp_full3   | Linear | vp_full1+ vp_full2    | 50      | $2 \times 25$          |
| T_full1    | Linear | vp_full3+ pose_full3  | 128     | $2 \times 64$          |
| T_full2    | Linear | T_full1               | 256     | $2 \times 128$         |
| T_full3    | Linear | T_full2               | 512     | $2 \times 256$         |
| T_full4    | Linear | T_full3               | 1024    | $2 \times 512$         |
| T_full5    | Linear | T_full4               | 512     | $2 \times 256$         |
| T_full6    | Linear | T_full5               | 256     | $2 \times 128$         |
| T_full7    | Linear | T_full6               | 128     | $2 \times 64$          |
| T_full8    | Linear | T_full7               | 50      | $2 \times 25$          |
| -          | ADD    | $p_a$                 | -       |                        |

Table 1: Network details of the  $\mathcal{P}_T$ , which is used to transform the pose into target view. There are three different modules in this network. The first one is the pose transformation module that takes the subsequent source poses as input and determines the change in pose. Second, the change in viewpoint estimator which takes the source and target viewpoints and learns a viewpoint deviation in latent space. The last module takes the estimated change in pose and transforms it to the target viewpoint with the help of latent encodings for change in viewpoint. Finally, we will take the transformed pose motion to conduct an element-wise addition to our estimated pose and generate the target pose for next time-step.

**Limitations** We would like to discuss the limitations of our approach. As the results 1 show, our PAS-GAN shows very high-quality generation results both from frame-level and video-level. In fact, the blur produced by the previous method are greatly eliminated. However, our method

also produces results with some artifacts that can be seen in the videos and frames. We analyze that this artifact is caused by the fact that our decoder is a video-level 3D decoder (although we use the same decoder as RTNet [4], the artifacts caused by it are obscured by the blur). This is-

| Name     | Layer       | Input    | Kernel Dims<br>(H × W) | Strides<br>(H × W) | Output Dims<br>(H × W × C) |
|----------|-------------|----------|------------------------|--------------------|----------------------------|
| Conv1a   | 2D Conv     | $P^j$    | $3 \times 3$           | $1 \times 1$       | $112 \times 112 \times 64$ |
| ReLU1a   | ReLU        | Conv1a   | -                      | -                  | $112 \times 112 \times 64$ |
| Conv1b   | 2D Conv     | ReLU1a   | $3 \times 3$           | $1 \times 1$       | $112 \times 112 \times 64$ |
| ReLU1b   | ReLU        | Conv1b   | -                      | -                  | $112 \times 112 \times 64$ |
| MaxPool1 | 2D Max Pool | ReLU1b   | $2 \times 2$           | $2 \times 2$       | $56 \times 56 \times 64$   |
| Conv2a   | 2D Conv     | MaxPool1 | $3 \times 3$           | $1 \times 1$       | $56 \times 56 \times 128$  |
| ReLU2a   | ReLU        | Conv2a   | -                      | -                  | $56 \times 56 \times 128$  |
| Conv2b   | 2D Conv     | ReLU2a   | $3 \times 3$           | $1 \times 1$       | $56 \times 56 \times 128$  |
| ReLU2b   | ReLU        | Conv2b   | -                      | -                  | $56 \times 56 \times 128$  |
| MaxPool2 | 2D Max Pool | ReLU2b   | $2 \times 2$           | $2 \times 2$       | $28 \times 28 \times 128$  |
| Conv3a   | 2D Conv     | MaxPool2 | $3 \times 3$           | $1 \times 1$       | $28 \times 28 \times 256$  |
| ReLU3a   | ReLU        | Conv3a   | -                      | -                  | $28 \times 28 \times 256$  |
| Conv3b   | 2D Conv     | ReLU3a   | $3 \times 3$           | $1 \times 1$       | $28 \times 28 \times 256$  |
| ReLU3b   | ReLU        | Conv3b   | -                      | -                  | $28 \times 28 \times 256$  |
| Conv3c   | 2D Conv     | ReLU3b   | $3 \times 3$           | $1 \times 1$       | $28 \times 28 \times 256$  |
| ReLU3c   | ReLU        | Conv3c   | -                      | -                  | $28 \times 28 \times 256$  |
| MaxPool3 | 2D Max Pool | ReLU3c   | $2 \times 2$           | $2 \times 2$       | $14 \times 14 \times 256$  |
| Conv4a   | 2D Conv     | ReLU2b   | $3 \times 3$           | $1 \times 1$       | $14 \times 14 \times 128$  |
| ReLU4a   | ReLU        | Conv4a   | -                      | -                  | $14 \times 14 \times 128$  |
| Conv4b   | 2D Conv     | ReLU3c   | $3 \times 3$           | $1 \times 1$       | $28 \times 28 \times 128$  |
| ReLU4b   | ReLU        | Conv4b   | -                      | -                  | $28 \times 28 \times 128$  |
| Conv4c   | 2D Conv     | MaxPool3 | $3 \times 3$           | $1 \times 1$       | $56 \times 56 \times 128$  |
| ReLU4c   | ReLU        | Conv4c   | -                      | -                  | $56 \times 56 \times 128$  |
| Conv4d   | 2D Conv     | $P^j$    | $3 \times 3$           | $1 \times 1$       | $112 \times 112 \times 32$ |
| ReLU4d   | ReLU        | Conv4d   | -                      | -                  | $112 \times 112 \times 32$ |

Table 2: Network details of  $\mathcal{E}_a$ , which was based upon [6]. The above table contains all layers of the encoder and four additional layers to transform the featuremap to maintain the number of channels. The row of Input indicates where the input of this layer comes from. Since the proposed method involves Multi-Scale Learning framework, there are four outputs from this network: ReLU4a, ReLU4b, ReLU4c and ReLU4d.

| Name   | Layer       | Input               | Kernel Dims<br>(H × W) | Strides<br>(H × W) | Output Dims<br>(H × W × C) |
|--------|-------------|---------------------|------------------------|--------------------|----------------------------|
| Conv1  | 2D Conv     | $x_{a1}$            | $3 \times 3$           | $4 \times 4$       | $14 \times 14 \times 25$   |
| Conv2  | 2D Conv     | $x_{a2}$            | $3 \times 3$           | $2 \times 2$       | $14 \times 14 \times 25$   |
| Conv2  | 2D Conv     | $x_{a3}$            | $3 \times 3$           | $1 \times 1$       | $14 \times 14 \times 25$   |
| Final1 | 2D Conv     | Conv1, Conv2, Conv3 | $3 \times 3$           | $1 \times 1$       | $14 \times 14 \times 50$   |
| Final2 | 2D Conv     | Final1              | $3 \times 3$           | $1 \times 1$       | $14 \times 14 \times 25$   |
| Final3 | SoftmaxMean | Final2              | -                      | -                  | $25 \times 2$              |

Table 3: Network details of  $\mathcal{P}_E$ . It contains three convolutional layers to transform the input featuremaps to similar spatial size and three additional layers to predict the pose. Notice that, the final3 layer calculates the softmax of the last two dimensions of the input to obtain the probability vector. The output of this network would be number of joints with 2D coordinates.

sue is due to the fact that the interaction between frames resulted from 3D convolution. But compared to frame-by-frame generation network [5, 8], we are more efficient and resource-saving. We believe that designing a more innovative decoder is the key to solve this problem.

## References

- [1] Kyunghyun Cho, Bart van Merriënboer, Çağlar Gülçehre, Fethi Bougares, Holger Schwenk, and Yoshua Bengio. Learning phrase representations using RNN encoder-decoder for statistical machine translation. *CoRR*, abs/1406.1078, 2014.

| Name   | Layer       | Input                                                              | Kernel Dims<br>(T × H × W) | Strides<br>(T × H × W) | Output Dims<br>(T × H × W × C)       |
|--------|-------------|--------------------------------------------------------------------|----------------------------|------------------------|--------------------------------------|
| Conv1a | 3D Conv     | $\mathcal{E}_a^{\text{final}}(1)$<br>+ $\mathcal{P}_T$             | $3 \times 3 \times 3$      | $1 \times 1 \times 1$  | $16 \times 14 \times 14 \times 128$  |
| ReLU1a | ReLU        | Conv1a                                                             | -                          | -                      | $16 \times 14 \times 14 \times 128$  |
| Conv1b | 3D Conv     | ReLU1a                                                             | $3 \times 3 \times 3$      | $1 \times 1 \times 1$  | $16 \times 14 \times 14 \times 128$  |
| ReLU1b | ReLU        | Conv1b                                                             | -                          | -                      | $16 \times 14 \times 14 \times 128$  |
| Inter1 | Interpolate | ReLU1b                                                             | -                          | -                      | $16 \times 28 \times 28 \times 128$  |
| Conv2a | 3D Conv     | $\mathcal{E}_a^{\text{final}}(2)$<br>+ $\mathcal{P}_T$<br>+ Inter1 | $3 \times 3 \times 3$      | $1 \times 1 \times 1$  | $16 \times 28 \times 28 \times 128$  |
| ReLU2a | ReLU        | Conv2a                                                             | -                          | -                      | $16 \times 28 \times 28 \times 128$  |
| Conv2b | 3D Conv     | ReLU2a                                                             | $3 \times 3 \times 3$      | $1 \times 1 \times 1$  | $16 \times 28 \times 28 \times 64$   |
| ReLU2b | ReLU        | Conv2b                                                             | -                          | -                      | $16 \times 28 \times 28 \times 64$   |
| Inter2 | Interpolate | ReLU2b                                                             | -                          | -                      | $16 \times 56 \times 56 \times 64$   |
| Conv3a | 3D Conv     | $\mathcal{E}_a^{\text{final}}(3)$<br>+ $\mathcal{P}_T$<br>+ Inter2 | $3 \times 3 \times 3$      | $1 \times 1 \times 1$  | $16 \times 56 \times 56 \times 128$  |
| ReLU3a | ReLU        | Conv3a                                                             | -                          | -                      | $16 \times 56 \times 56 \times 128$  |
| Conv3b | 3D Conv     | ReLU3a                                                             | $3 \times 3 \times 3$      | $1 \times 1 \times 1$  | $16 \times 56 \times 56 \times 32$   |
| ReLU3b | ReLU        | Conv3b                                                             | -                          | -                      | $16 \times 56 \times 56 \times 32$   |
| Inter3 | Interpolate | ReLU3b                                                             | -                          | -                      | $16 \times 112 \times 112 \times 32$ |
| Conv4a | 3D Conv     | Inter3<br>+ $\mathcal{E}_a^{\text{final}}(4)$<br>+ $\mathcal{P}_T$ | $3 \times 3 \times 3$      | $1 \times 1 \times 1$  | $16 \times 112 \times 112 \times 8$  |
| ReLU4a | ReLU        | Conv4a                                                             | -                          | -                      | $16 \times 112 \times 112 \times 8$  |
| Conv4b | 3D Conv     | ReLU4a                                                             | $1 \times 1 \times 1$      | $1 \times 1 \times 1$  | $16 \times 112 \times 112 \times 3$  |
| Sig    | Sigmoid     | Conv4b                                                             | -                          | -                      | $16 \times 112 \times 112 \times 3$  |

Table 4: Network details for the Video Decoder,  $\mathcal{D}_V$ , which generates the final output video  $v_t$  based upon the three sets of transformed appearance features and the Multi-scale attention  $\mathcal{M}_A$ . Note that hierarchical generation is used, so the larger appearance features are concatenated as input where appropriate. The final output has the same dimensions as the input video  $V^i$ .

- [2] Max Jaderberg, Karen Simonyan, Andrew Zisserman, et al. Spatial transformer networks. In *Advances in neural information processing systems*, pages 2017–2025, 2015.
- [3] M. Lakhal, O. Lanz, and A. Cavallaro. View-lstm: Novel-view video synthesis through view decomposition. In *2019 IEEE/CVF International Conference on Computer Vision (ICCV)*, pages 7576–7586, 2019.
- [4] Kara Marie Schatz, Erik Quintanilla, Shruti Vyas, and Y. Rawat. A recurrent transformer network for novel view action synthesis. In *Proceedings of the European Conference on Computer Vision (ECCV)*, 2020.
- [5] Aliaksandr Siarohin, Stéphane Lathuilière, Sergey Tulyakov, Elisa Ricci, and Nicu Sebe. First order motion model for image animation. In H. Wallach, H. Larochelle, A. Beygelzimer, F. d'Alché-Buc, E. Fox, and R. Garnett, editors, *Advances in Neural Information Processing Systems*, volume 32, pages 7137–7147. Curran Associates, Inc., 2019.
- [6] Karen Simonyan and Andrew Zisserman. Very deep convolutional networks for large-scale image recognition. *arXiv preprint arXiv:1409.1556*, 2014.
- [7] Shruti Vyas, Yogesh Singh Rawat, and Mubarak Shah. Time-aware and view-aware video rendering for unsupervised representation learning. *CoRR*, abs/1811.10699, 2018.
- [8] Ting-Chun Wang, Ming-Yu Liu, Jun-Yan Zhu, Guilin Liu, Andrew Tao, Jan Kautz, and Bryan Catanzaro. Video-to-video synthesis. In *Advances in Neural Information Processing Systems (NeurIPS)*, 2018.

| Name         | Layer        | Input                                                     | Kernel Dims<br>(H × W)       | Strides<br>(H × W) | Output Dims<br>(H × W × C) |
|--------------|--------------|-----------------------------------------------------------|------------------------------|--------------------|----------------------------|
| STN-Conv1    | 1D Conv      | $p_t1$                                                    | 3                            | 1                  | $25 \times 2$              |
| STN-Conv2    | 1D Conv      | $p_t2$                                                    | 3                            | 1                  | $25 \times 2$              |
| STN-Conv3    | 1D Conv      | STN-Conv1& STN-Conv1                                      | 3                            | 1                  | $25 \times 2$              |
| STN-Linear1  | Linear       | STN-Maxpool2                                              | 1                            | -                  | 32                         |
| STN-Linear2  | Linear       | STN-Linear1                                               | 1                            | -                  | 6                          |
| Pose-crop    | -            | $\mathcal{E}_a$ -Conv3(1)                                 | -                            | -                  | scale × scale              |
| Affine_Trans | Grid_sampler | STN-Linear2 +Pose-crop                                    | -                            | -                  | $14 \times 14 \times 128$  |
| GTN-Conv1    | 2D Conv      | Affine_Trans<br>+ $p_t$ -Gaussian                         | Grid_sampler<br>$7 \times 7$ | $1 \times 1$       | $14 \times 14 \times 256$  |
| GTN-Split    | Split        | GTN-Conv1                                                 | -                            | -                  | $14 \times 14 \times 128$  |
| GTN-Sig1     | Sigmoid      | GTN-Split(1)                                              | -                            | -                  | $14 \times 14 \times 128$  |
| GTN-Sig2     | Sigmoid      | GTN-Split(2)                                              | -                            | -                  | $14 \times 14 \times 128$  |
| GTN-Conv2    | 2D Conv      | $\mathcal{E}_a$ -Conv3(1)<br>+ $p_t$ -Gaussian            | $7 \times 7$                 | $1 \times 1$       | $14 \times 14 \times 128$  |
| GTN-Tanh     | Tanh         | GTN-Conv2                                                 | -                            | -                  | $14 \times 14 \times 128$  |
| GTN-Final    | Concat       | (1 - GTN-Sig2) * $p_t$ -Gaussian<br>+ GTN-Sig2 * GTN-Tanh | -                            | -                  | $14 \times 14 \times 128$  |

Table 5: Network details of the  $\mathcal{LGTN}$ . It is based on the Spatial transformation network [2], whose output would be the predicted affine matrix. We adopt the key-region separator as discussed in main paper to crop the appearance featuremap. Then, we use grid sampler to transform the feature. Then we use a GRU[1] global transformation on the output of local-transformed feature. At last, we add this transformed foreground feature back to the background generated by the  $\mathcal{P}_{crop}$ .

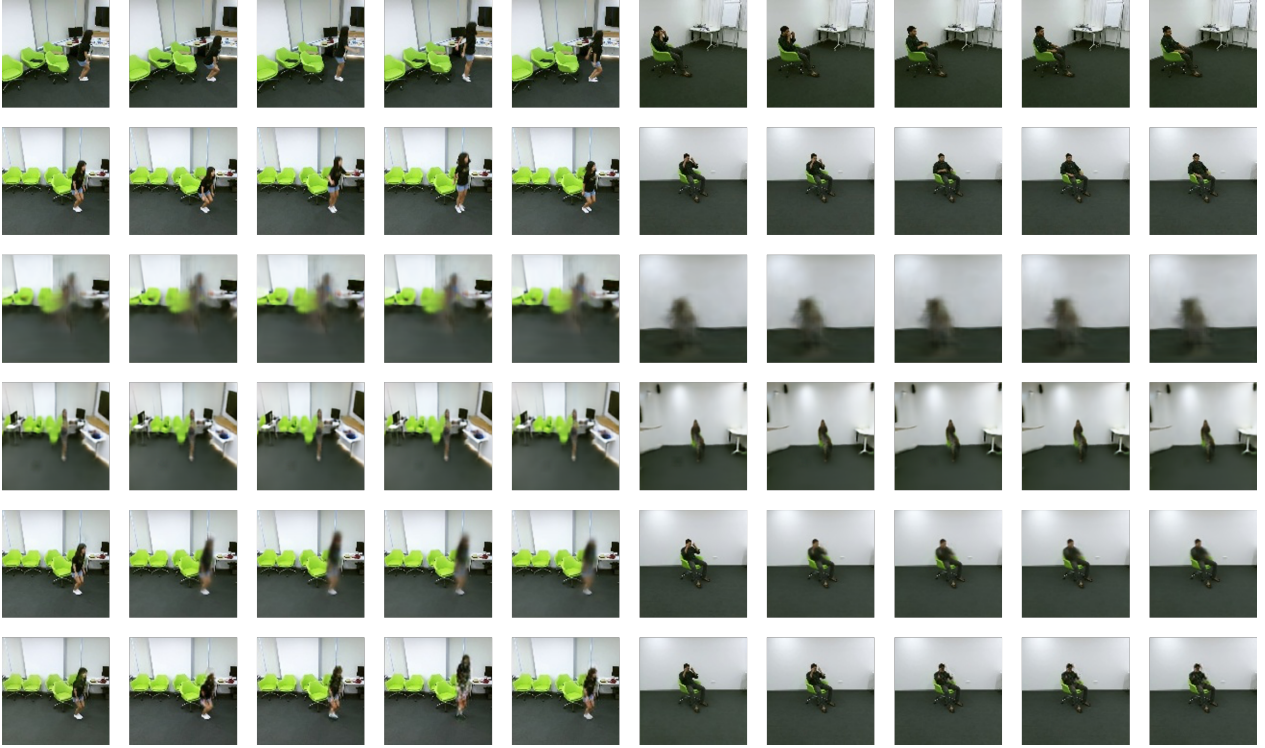

Figure 1: Comparison of the generated frames between our proposed and existing methods. Row 1: source, row 2: target, row 3: VNet [3], row 4: VRNet [7], row 5: BasicNet, row 6: RTNet [4], row 7: proposed method. We can observe that that RTNet [4] generates good quality frames, but it lacks action dynamics.

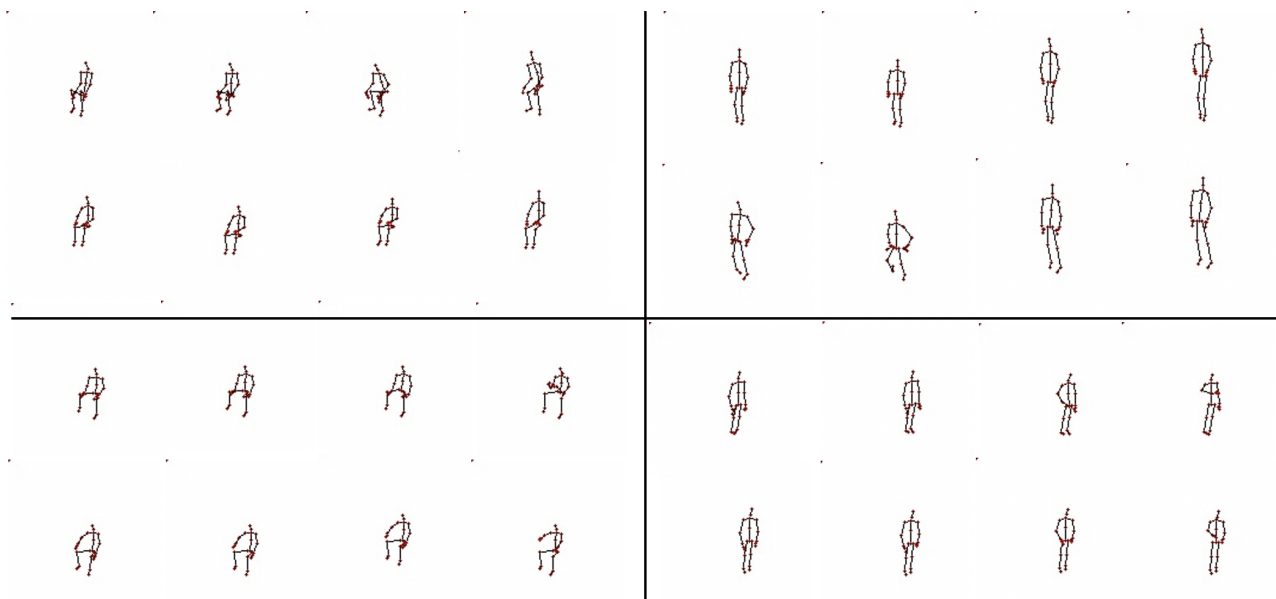

Figure 2: Generated pose results. Each corner represents one sample. In every corner, the first row is the target and the second row is the generated results. We sample 4 frames (1, 3, 5 and 7) from original eight generated frames.

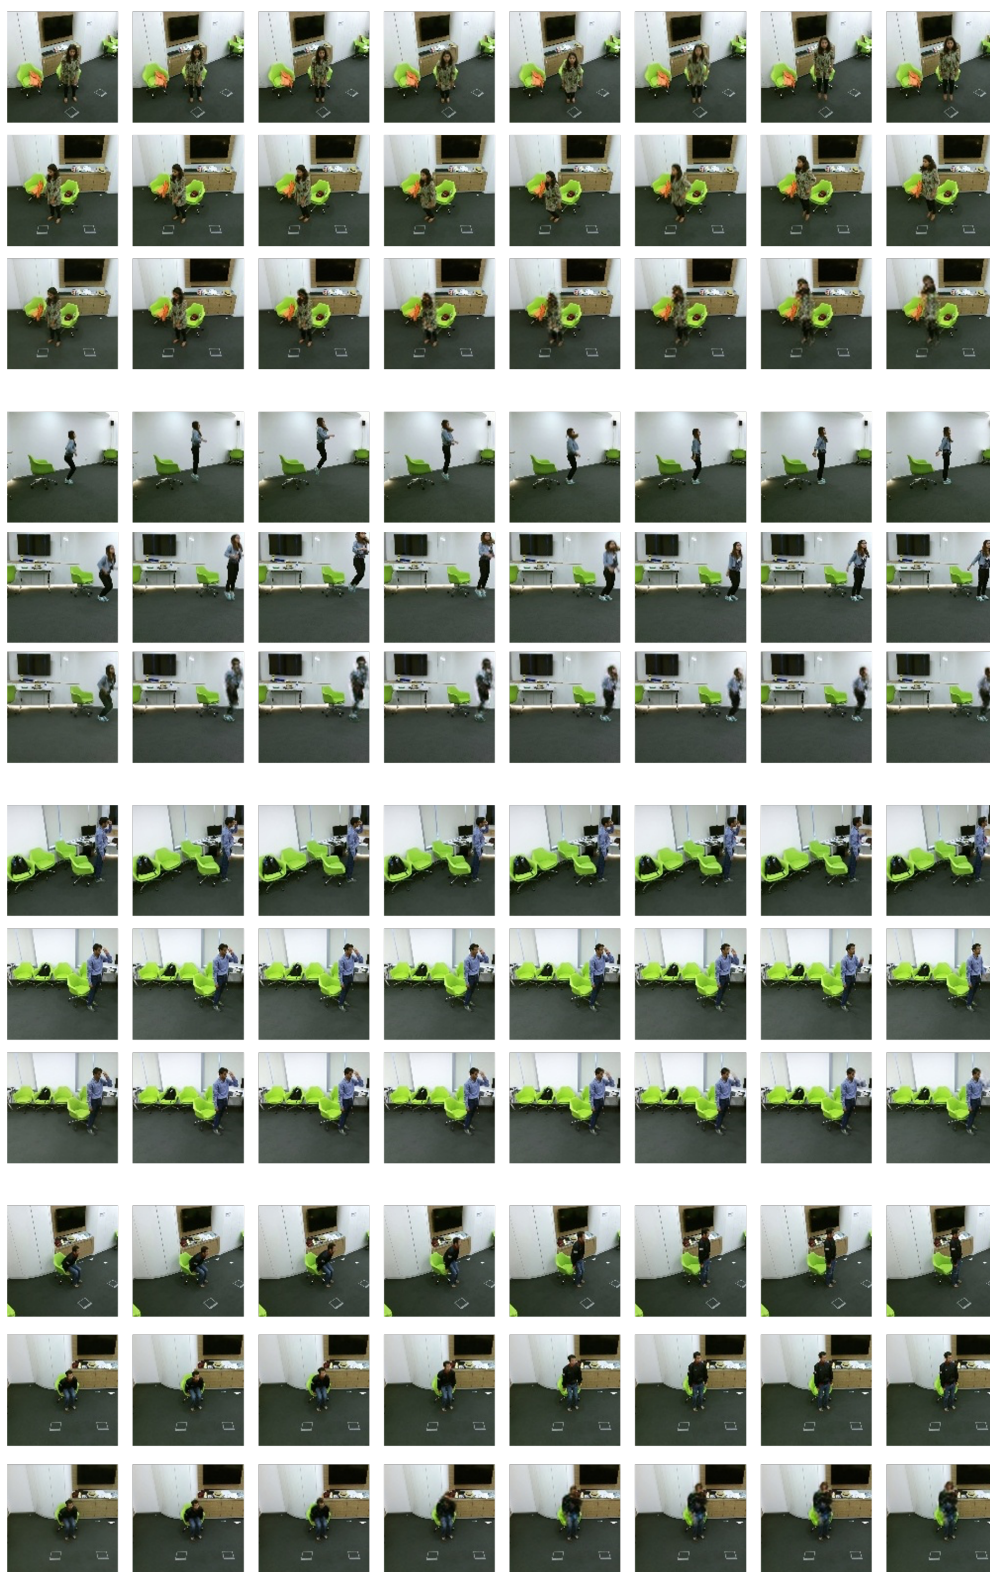

Figure 3: More qualitative results. Every three rows represent a video sample. In each sample, first row: the source video; second row: the target video; third row: the generated video.

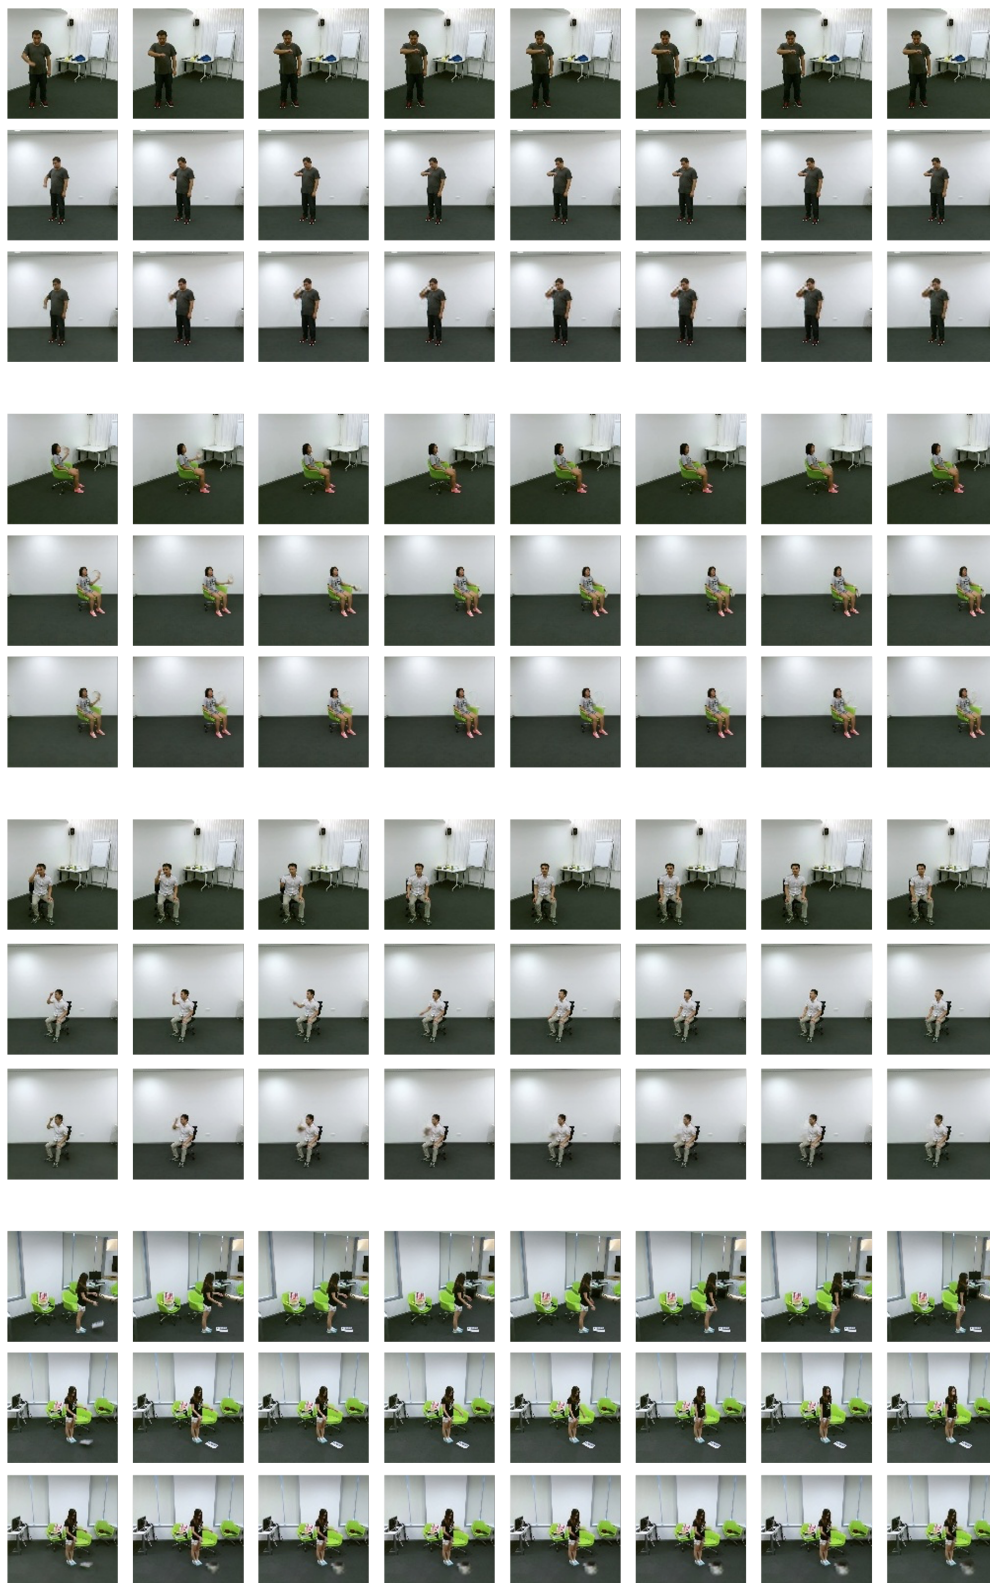

Figure 4: More qualitative results. Every three rows represent a video sample. We sample 8 frames. Each column represents one frame. In each sample, first row: source video. The second row: target video. The third row: generated video.
